# Supplementary material for: Earnings Pressure and Long-Term Corporate Governance: Can Long-Term-Oriented Investors and Managers Reduce the Quarterly Earnings Obsession?
Source: Atypon-hosted journal article supplement (doi:10.1287/orsc.2016.1056), 2016-03-01
Supplement: orsc.2016.1056-sm-os-ms-12-6600.r3_-_online_appendix.pdf [file orsc.2016.1056-sm-os-ms-12-6600.r3_-_online_appendix.pdf]

## Online Appendix A: A Stylized Model about Earnings Pressure Effect

We assume that management optimizes the following objective, which is a combination of current earnings and future competitiveness.

$$\text{Objective}_t(x_t|\mathbf{m}, \delta) = E_t(x_t|\mathbf{m}) + \delta * C_{t+1}(x_t|\mathbf{m})$$

where:

$\{\mathbf{m}\}$  – a set of parameters representing market conditions, considered exogenous to the management problem, such as market size, demand elasticity, competitive structure, cost structure, etc.

$x_t$  – competitive behavior of the firm at the first period, where higher  $x$  represents more aggressive behavior.

$\delta$  – implicit discounting of future competitiveness relative to current earnings.  $0 < \delta < \frac{1}{1+r}$ , where  $r = \text{WACC}$ , or optimal discounting.

$E_t(x_t|\mathbf{m})$  – current earnings

$C_{t+1}(x_t|\mathbf{m})$  – NPV of future earnings, based on market conditions  $\{\mathbf{m}\}$  and competitive behavior at first period  $x$ .

For given  $\{\mathbf{m}\}$ , we assume that  $E_t(x_t|\mathbf{m})$  is smooth, and concave on  $x$  (i.e.,  $E'' < 0$ , there is an optimal behavior that maximizes current earnings). For given  $\{\mathbf{m}\}$ , we assume that  $C_{t+1}(x_t|\mathbf{m})$  is smooth and either linear or concave on  $x$  (more aggressive behavior in the first period increases future competitiveness either linearly or at a decreasing rate).

Let's define:  $\hat{x}^E(\mathbf{m}) = \text{argmax } E_t(x_t|\mathbf{m})$  the optimal behavior if only optimizing current earnings.

We assume that the function  $C_{t+1}(x_t|\mathbf{m})$  either is continuously increasing, or if it has a maximum, it is greater than  $\hat{x}^E(\mathbf{m})$ . The intuition is that if the company were to select competitive behavior in the initial period in order to optimize competitiveness, it would be more competitive than  $\hat{x}^E(\mathbf{m})$ : if there exist  $\hat{x}^C(\mathbf{m}) = \text{argmax } C_{t+1}(x_t|\mathbf{m})$  then  $\hat{x}^C(\mathbf{m}) > \hat{x}^E(\mathbf{m})$ .

Then the range of  $x$  can be divided in three zones:

- For  $x_t < \hat{x}^E(\mathbf{m})$ :  $E' > 0$ ;  $E'' < 0$ ;  $C' > 0$ ;  $C'' = < 0$
- For  $\hat{x}^E(\mathbf{m}) < x_t < \hat{x}^C(\mathbf{m})$ :  $E' < 0$ ;  $E'' < 0$ ;  $C' > 0$ ;  $C'' \leq 0$
- For  $x_t > \hat{x}^C(\mathbf{m})$ :  $E' < 0$ ;  $E'' < 0$ ;  $C' < 0$ ;  $C'' \leq 0$

In the space  $\hat{x}^E(\mathbf{m}) < x_t < \hat{x}^C(\mathbf{m})$ , we state that the company faces “inter-temporal trade-offs”, since  $E' < 0$ , but  $C' > 0$ . That is, increasing competition more than optimal for current earnings would reduce current earnings but increase competitiveness.

For the range  $x < \hat{x}^E(\mathbf{m})$ , there is no trade-off since changes in competitive behavior that improves current earnings would also improve competitiveness.

Let's define  $x^*(\mathbf{m}, \delta) = \text{argmax Objective}(\mathbf{m}|x, \delta)$ . The optimum will be such that

$$E_t' + \delta C_{t+1}' = 0.$$

We can show that:

- $x^*(\mathbf{m}, \delta) \geq \hat{x}^E(\mathbf{m})$  (i.e., a manager optimizing a combination of current earnings and future competitiveness would be more aggressive than one only optimizing current earnings).

$x^*(\mathbf{m}, \delta)$  cannot be strictly below  $\hat{x}^E(\mathbf{m})$ , since in that range, both  $E_t$  and  $C_{t+1}$  would have a positive slope. Therefore, a manager increasing competitive behavior would be able to increase both current earnings and future competitiveness, without facing a trade-off.

- $x^*(\mathbf{m}, \delta)$  is increasing on  $\delta$  (i.e., positive derivative of  $x^*(\mathbf{m}, \delta)$  with respect to  $\delta$ ).  $x^*(\mathbf{m}, \delta)$  fulfills the first order condition that  $E_t' + \delta C_{t+1}' = 0$ . For levels of  $x_t$  above  $\hat{x}^E(\mathbf{m})$ , then  $E_t' \leq 0$  and  $C_{t+1}' \geq 0$ , at least for the range  $\hat{x}^E(\mathbf{m}) < x_t < \hat{x}^C(\mathbf{m})$ . Given the assumption of concavity of  $E_t$  and linearity or concavity of  $C_{t+1}$ ,  $E_t'$  will be negative and non-increasing in that range, while  $C_{t+1}'$  will be positive and non-increasing in that range. As the discount rate decreases, the product  $\delta C_{t+1}'$  (representing the present value of an increase on competitiveness) will decrease, and the equilibrium will take place at a point where  $E_t'$  is higher (i.e., the loss of current earnings is less negative). Given the concavity assumption, which implies that  $E_t'$  is non-increasing on  $x_t$ , this would move  $x_t^*$  leftwards towards  $\hat{x}^E(\mathbf{m})$ . As  $\delta$  converges towards zero, then  $x^*(\mathbf{m}, \delta)$  would converge to  $\hat{x}^E(\mathbf{m})$ . That is, as future competitiveness becomes less important, then behavior converges towards current earnings optimization.

For an illustration with specific functional forms, using quadratic equations for  $E_t$  and  $C_{t+1}$ :

$$E_t(x_t | \mathbf{m}) = a_m + b_m \cdot x - c_m \cdot x^2, \quad a_m, b_m, c_m, x > 0$$

$$C_{t+1}(x_t | \mathbf{m}) = \alpha_m + \beta_m \cdot x - \gamma_m \cdot x^2, \quad \alpha_m, \beta_m, x > 0, \gamma_m \geq 0$$

For simplicity, we drop the  $m$  subscripts.

$$\text{Objective}(\mathbf{m} | x, \delta) = (a_m + b_m \cdot x - c_m \cdot x^2) + (\alpha_m + \beta_m \cdot x - \gamma_m \cdot x^2)$$

$$\hat{x}^E(\mathbf{m}) = \frac{b}{2c}$$

$$\hat{x}^C(\mathbf{m}) = \frac{\beta}{2\gamma} \text{ if } \gamma > 0, \text{ or } \infty \text{ if } C_{t+1} \text{ is linear}$$

We assume  $\hat{x}^C(\mathbf{m}) > \hat{x}^E(\mathbf{m})$ , which implies  $\frac{\beta}{2\gamma} > \frac{b}{2c}$ , if  $\gamma > 0$

$$x^*(\mathbf{m}, \delta) = \frac{b + \delta\beta}{\alpha(c + \delta\gamma)} \text{ if } \gamma > 0, \text{ or } \frac{b + \delta\beta}{\alpha c} \text{ if } \gamma = 0$$

We see that the numerator is increasing on  $\delta$ , but so is the denominator (unless  $\gamma = 0$ ). To find out whether  $x^*(\mathbf{m}, \delta)$  is increasing or decreasing on  $\delta$ , we calculate the derivative w.r.t.  $x$ :

$$\frac{\partial x^*(\mathbf{m}, \delta)}{\partial \delta} = \frac{\beta c - b\gamma}{\alpha(c + \delta\gamma)^2} \text{ if } \gamma > 0, \text{ or } \frac{\beta c}{\alpha c^2} \text{ if } \gamma = 0$$

If  $\gamma > 0$ :  $\frac{\beta c - b\gamma}{\alpha(c + \delta\gamma)^2} > 0$  because  $\alpha(c + \delta\gamma)^2 > 0$ , and  $\beta c - b\gamma > 0$  since  $\frac{\beta}{2\gamma} > \frac{b}{2c}$  implies that  $\beta c > b\gamma$

If  $\gamma = 0$ :  $\frac{\beta c}{\alpha c^2} > 0$  since all terms are  $> 0$ .

## Online Appendix B: Sample Airlines and Sample Attrition

These are the companies that were included in the full sample for dynamic panel data regression models.

| <b>DOT classification</b> | <b>DOT Reporting Airline</b> | <b>DOT Code</b> | <b>Ticker</b> | <b>Mean dedicated ownership</b> | <b>Mean unvested (mil. \$)</b> | <b>Mean transient ownership</b> | <b>Mean vested (mil. \$)</b> |
|---------------------------|------------------------------|-----------------|---------------|---------------------------------|--------------------------------|---------------------------------|------------------------------|
| Major                     | Alaska Airlines, Inc.        | AS              | ALK           | 10.77%                          | 0.27                           | 17.68%                          | 1.66                         |
| Major                     | American Airlines, Inc.      | AA              | AMR           | 20.59%                          | 24.41                          | 20.15%                          | 7.99                         |
| Major                     | Continental Air Lines, Inc.  | CO              | CAL           | 27.68%                          | 17.54                          | 39.71%                          | 9.74                         |
| Major                     | Delta Air Lines, Inc.        | DL              | DAL           | 22.25%                          | 2.84                           | 14.50%                          | 8.91                         |
| Major                     | Northwest Airlines, Inc.     | NW              | NWAC          | 31.38%                          | 0.07                           | 5.70%                           | 5.66                         |
| Major                     | Southwest Airlines, Co.      | WN              | LUV           | 10.31%                          | 64.96                          | 11.19%                          | 61.92                        |
| Major                     | United Air Lines, Inc.       | UA              | UAL           | 30.49%                          | 14.55                          | 24.34%                          | 22.15                        |
| Major                     | US Airways, Inc.             | US              | UAIR          | 20.82%                          | 25.78                          | 16.64%                          | 29.09                        |
| Regional                  | Continental Express Airline  | RU              | CAL           | 27.68%                          | 17.54                          | 39.71%                          | 9.74                         |
| Regional                  | Horizon Air                  | QX              | ALK           | 10.77%                          | 0.27                           | 17.68%                          | 1.66                         |
| Regional                  | US Air Shuttle               | TB              | UAIR          | 20.82%                          | 25.78                          | 16.64%                          | 29.09                        |

The sample used for the Difference-in-Differences analysis included more firms, since we could also look at the pricing behavior of private firms, or public firms that did not reported financials, as long as they competed in a duopoly market with firms that did. Here are the firms included in that sample:

| <b>DOT Classification</b> | <b>DOT Reporting Airline</b> | <b>DOT code</b> | <b>Ticker</b> | <b>Publicly-listed?</b> | <b>Main Sample?</b> |
|---------------------------|------------------------------|-----------------|---------------|-------------------------|---------------------|
| Major                     | Alaska Airlines, Inc.        | AS              | ALK           | Public                  | Yes                 |
| Major                     | America West Airlines, Inc.  | HP              | AWA           | Public                  |                     |
| Major                     | American Airlines, Inc.      | AA              | AMR           | Public                  | Yes                 |
| Major                     | Continental Air Lines, Inc.  | CO              | CAL           | Public                  | Yes                 |
| Major                     | Delta Air Lines, Inc.        | DL              | DAL           | Public                  | Yes                 |
| Major                     | JetBlue Airways              | B6              | JBLU          | Public                  |                     |
| Major                     | Northwest Airlines, Inc.     | NW              | NWAC          | Public                  | Yes                 |
| Major                     | Southwest Airlines, Co.      | WN              | LUV           | Public                  | Yes                 |
| Major                     | Trans World Airways, Llc     | TW              | TWA           | Public                  |                     |
| Major                     | United Air Lines, Inc.       | UA              | UAL           | Public                  | Yes                 |
| Major                     | US Airways, Inc.             | US              | UAIR          | Public                  | Yes                 |
| National                  | American Trans Air Inc.      | TZ              |               |                         |                     |
| National                  | Hawaiian Airlines, Inc.      | HA              | HA            | Public                  |                     |
| National                  | Markair Inc.                 | BF              |               |                         |                     |
| National                  | Morris Air Corporation       | KN              |               |                         |                     |

|          |                             |    |      |        |     |  |
|----------|-----------------------------|----|------|--------|-----|--|
| National | Spirit Air Lines            | NK |      |        |     |  |
| National | Sun Country Airlines        | SY |      |        |     |  |
| National | Vanguard Airlines, Inc.     | NJ | VNGD | Public |     |  |
| National | Western Pacific Airlines    | W7 | WPAC | Public |     |  |
| Regional | Air South Inc.              | WV |      |        |     |  |
| Regional | Aloha Airlines Inc.         | AQ |      |        |     |  |
| Regional | Carnival Air Lines Inc.     | KW |      |        |     |  |
| Regional | Continental Express Airline | RU | CAL  | Public | Yes |  |
| Regional | Harmony Airways             | HQ |      |        |     |  |
| Regional | Horizon Air                 | QX | ALK  | Public | Yes |  |
| Regional | Midway Airlines Inc.        | JI |      |        |     |  |
| Regional | Midwest Airlines, Inc.      | YX | MEH  | Public |     |  |
| Regional | Nations Air Express Inc.    | N5 |      |        |     |  |
| Regional | Pro Air Inc.                | P9 |      |        |     |  |
| Regional | Trans States Airlines       | 9N |      |        |     |  |
| Regional | Tristar Airlines Inc.       | T3 |      |        |     |  |

We also want to explain how the different data availability conditions for analysis influenced sample attrition. The table below explains the different subsamples, going from the full data available from DOT for 1994-2000, to the final sample, in terms of number of observations, and number of passengers associated with these observations. The first two conditions (that lagged DVs are available and markets are not monopoly) restricted the number of firm-quarters and observations moderately, but had little effect on the number of firms in the sample. As the table shows, the main attrition in terms of number of firms is due to missing financials and missing earnings pressure data, such as the missing of either institutional investor ownership (e.g., Hawaiian Airlines) or stock-based incentive (e.g., America West Airlines) information.

|                                                  | # of firms | # firm-quarters | #obs.  | # passengers |
|--------------------------------------------------|------------|-----------------|--------|--------------|
| <b>DOT 1994-2000</b>                             | 24         | 663             | 336528 | 2569127442   |
| <b>keeping incumbents<math>\geq</math>2</b>      | 23         | 427             | 296052 | 2271143971   |
| <b>taking lags of DV</b>                         | 21         | 356             | 211599 | 2007740818   |
| <b>missing earnings pressure</b>                 | 18         | 276             | 191479 | 1827036132   |
| <b>missing financials, ownership, incentives</b> | 11         | 186             | 151165 | 1495749709   |
| <b>final sample net outlier</b>                  | 11         | 177             | 145355 | 1456930957   |

## Online Appendix C: Validity of potential earnings estimate and earnings pressure measurement

### a. Effectiveness of potential earnings estimate vs. analysts' earnings forecast in predicting actual earnings

| Variables                 | Deviation1:<br>(Potential - Actual)/Stock Price | Deviation2:<br>(Analyst-Actual)/Stock Price |                                                             |
|---------------------------|-------------------------------------------------|---------------------------------------------|-------------------------------------------------------------|
| N                         | 599                                             | 599                                         |                                                             |
| <b>Distribution</b>       |                                                 |                                             |                                                             |
| 1 percentile              | -0.4122                                         | -0.1138                                     |                                                             |
| 10 percentile             | -0.0530                                         | -0.0182                                     |                                                             |
| 25 percentile             | -0.0188                                         | -0.0044                                     |                                                             |
| Median                    | 0.0037                                          | 0.0035                                      |                                                             |
| 75 percentile             | 0.0279                                          | 0.0267                                      |                                                             |
| 90 percentile             | 0.0723                                          | 0.0859                                      |                                                             |
| 99 percentile             | 0.3623                                          | 0.4705                                      |                                                             |
| Std. Dev.                 | 0.3138                                          | 0.3177                                      |                                                             |
| <b>Hypotheses Tested*</b> | <b>H<sub>0</sub>: Mean (Deviation1) = 0</b>     | <b>H<sub>0</sub>: Mean (Deviation2) = 0</b> | <b>H<sub>0</sub>: Mean (Deviation1) = Mean (Deviation2)</b> |
| Mean                      | 0.0195                                          | 0.0413                                      | -0.0217                                                     |
| Std. Error                | 0.0128                                          | 0.0130                                      | 0.0046                                                      |
| t-value                   | 1.5247                                          | 3.1780 <sup>†††</sup>                       | -4.7131 <sup>†††</sup>                                      |

<sup>†</sup>  $p < 0.10$ , <sup>††</sup>  $p < 0.05$ , <sup>†††</sup>  $p < 0.01$ , 1-sided

\*: The first two tests are one-sample t-tests; the third is a two-sample paired t-test.

### b. Association between earnings pressure measurement, downward revision of analysts' earnings forecasts, and future earnings decline

|                                                                          | N   | Mean   | s.d. | 1)   | 2)          | 3)          | 4)          | 5)          | 6)          |
|--------------------------------------------------------------------------|-----|--------|------|------|-------------|-------------|-------------|-------------|-------------|
| 1) <b>Earnings pressure</b>                                              | 599 | 0.0059 | 0.04 |      | <i>0.38</i> | <i>0.15</i> | <i>0.30</i> | <i>0.03</i> | <i>0.03</i> |
| 2) <b>Earnings pressure dummy (=1 if pressure&gt;0)</b>                  | 599 | 0.5175 | 0.50 | 0.39 |             | <i>0.21</i> | <i>0.20</i> | <i>0.04</i> | <i>0.03</i> |
| 3) <b>Downward revision dummy (=1 if analyst revise downward)</b>        | 599 | 0.6244 | 0.48 | 0.16 | 0.21        |             | <i>0.39</i> | <i>0.19</i> | <i>0.18</i> |
| 4) <b>Downward revision</b>                                              | 599 | 0.3133 | 0.85 | 0.32 | 0.18        | 0.40        |             | <i>0.22</i> | <i>0.36</i> |
| 5) <b>Future earnings decline dummy (=1 if future earnings declines)</b> | 599 | 0.5109 | 0.50 | 0.03 | 0.03        | 0.19        | 0.21        |             | <i>0.67</i> |
| 6) <b>Future earnings decline</b>                                        | 599 | 0.0795 | 1.17 | 0.03 | 0.02        | 0.18        | 0.37        | 0.66        |             |

**Note:** Correlations in italics are *within-group* correlations by firm.

## Online Appendix D: Definition of control variables in dynamic panel data models

| Variable Name         | Definition                                                                                                                                                                                                                                                                                                                                                                                                                                       |
|-----------------------|--------------------------------------------------------------------------------------------------------------------------------------------------------------------------------------------------------------------------------------------------------------------------------------------------------------------------------------------------------------------------------------------------------------------------------------------------|
| Financial constraint  | <p>KZ index (Kaplan and Zingales, 1997): <math>KZ_{it} = -1.002 \frac{CF_{it}}{A_{it-1}} - 39.368 \frac{DIV_{it}}{A_{it-1}} - 1.315 \frac{C_{it}}{A_{it-1}} + 3.139 LEV_{it}</math></p> <p>where <math>CF_{it} / A_{it-1}</math> is cash flow over lagged assets, <math>DIV_{it} / A_{it-1}</math> is cash dividends over lagged assets, <math>C_{it} / A_{it-1}</math> is cash balances over assets, and <math>LEV_{it}</math> is leverage.</p> |
| Financial performance | Return on Assets in the previous quarter                                                                                                                                                                                                                                                                                                                                                                                                         |
| % round trip tickets  | Percentage of round trip tickets of all of a firm's tickets on the airline route                                                                                                                                                                                                                                                                                                                                                                 |
| % high class          | Percentage of first and business class tickets on the airline route                                                                                                                                                                                                                                                                                                                                                                              |
| % direct flights      | Percentage of passengers flying direct (without connections) on the airline route                                                                                                                                                                                                                                                                                                                                                                |
| Cost                  | Standard Industry Fare Level (SIFL) divided by market distance                                                                                                                                                                                                                                                                                                                                                                                   |
| Market size           | Square root of total number of passengers traveling the market with any airline                                                                                                                                                                                                                                                                                                                                                                  |
| Potential entrants    | Number of potential entrants (firms present at both ends of the city-pair route but do not serve the city-pair)                                                                                                                                                                                                                                                                                                                                  |
| Market Herfindahl     | Herfindahl-Hirshman index of concentration at city-pair                                                                                                                                                                                                                                                                                                                                                                                          |
| Airport Herfindahl    | Average of the Herfindahl-Hirshman index of concentrations of total enplanements at both end-cities                                                                                                                                                                                                                                                                                                                                              |

## Online Appendix E: Market-level Analyses

Since earnings pressure may change the competitive behavior not only of the firm experiencing it, but also its market rivals, we explored the aggregate impact of earnings pressure shocks on market-level outcomes such as average prices or total frequencies in duopoly markets. In addition to the substantive insights from observing market-level outcomes, the specification helps reduce omitted variable bias by comparing independent and dependent variables at different levels of analysis. We followed the approaches employed by Chevalier (1995a, b) and contrasted the changes in market-level average prices and total frequencies in duopoly markets under three different conditions: (a) a control scenario where both duopolists remain without earnings pressure for both periods, (b) a treatment scenario, similar to the difference-in-differences above, where only one firm experiences an earnings pressure shock in the second period, and (c) a different treatment scenario where both duopolists experience earnings pressure shocks in the second period. These comparisons provide insight on the market-level competitive dynamics affected by earnings pressure.

We found in the duopoly market sample, market average prices rise when one of the firms became under earnings pressure in the second quarter (2.02% vs. -0.11%,  $t = 5.59$ ), and rise even more when both firms became under earnings pressure in the second quarter (7.03% vs. -0.11%,  $t = 17.63$ ). We also find total market frequencies did not change when only one firm experienced earnings pressure, but dropped when both firms experienced earnings pressure in the second quarter (-0.72% vs. 0.95%,  $t = 4.96$ ). This suggest that when only one company experiences earnings pressure, the market price increases slightly (probably because the firm that does not experience pressure follows along with price increases), but the frequency reduction by the pressured firm is balanced by the frequency increase by the non-pressured competitor. In contrast, when both competitors experience earnings pressure at the same time, the softening of competitive behavior is aligned among them, leading to higher prices but lower frequencies in the market. The market-level analysis, together with the DiD analysis, although using a smaller subsample of duopoly markets, provided insights and evidence in a quasi-experimental setting that is aligned with the statistical associations found in the panel data regressions.
